# Supplementary material
Source: publisher figshare collection journal article supplement (https://acs.figshare.com/ndownloader/files/16717958)
Supplement: Supplementary file 1 [file 16717958]

Supporting Information

**Reversible Sn-Sn Triple Bond Dissociation in a Distannyne: Support for Charge Shift Bonding Character**

Ting Yi Lai, Lizhi Tao, R. David Britt and Philip P. Power\*

\*Department of Chemistry, University of California, One Shields Avenue, Davis, California 95616, United States

Fax: +1-520-752-8995

E-mail: [pppower@ucdavis.edu](mailto:pppower@ucdavis.edu)

Table of Contents

| Page |                                                                                                                                                        |
|------|--------------------------------------------------------------------------------------------------------------------------------------------------------|
| S1   | Table of Contents                                                                                                                                      |
| S2   | General Experimental Procedures                                                                                                                        |
| S4   | Figure S1. VT $^1\text{H}$ NMR Spectrum of $\text{Ar}^{i\text{Pr}_4}\text{SnSnAr}^{i\text{Pr}_4}$ (500 MHz, $\text{C}_6\text{D}_6$ , 298K to 358K ppm) |
| S5   | van't Hoff Analysis Figure S1                                                                                                                          |

## General Experimental Procedures

**General Procedures.** All operations were carried out under anaerobic and anhydrous conditions using modified Schlenk techniques. All solvents were dried over alumina columns, stored over an Na mirror and degassed prior to use.  $\text{Ar}^{i\text{Pr}_4}\text{SnSnAr}^{i\text{Pr}_4}$  was synthesized via the reported literature procedure.<sup>1</sup> The  $^1\text{H}$  NMR spectroscopic data were collected on a Bruker 500MHz spectrometer. van't Hoff analysis was calculated with reported procedure.<sup>2</sup>

**EPR Spectroscopy.** The thermolysis-treated  $\text{Ar}^{i\text{Pr}_4}\text{SnSnAr}^{i\text{Pr}_4}$  EPR samples was prepared by heating at 80 °C for ~30 min before being flash frozen in liquid nitrogen. The X-band (9.38 GHz) continuous-wave (CW) EPR spectra were recorded on a Bruker (Billerica, MA) Biospin EleXsys E500 spectrometer equipped with a super-high Q resonator (ER4122SHQE). Cryogenic temperatures were achieved and controlled using an ESR900 liquid helium cryostat in conjunction with a temperature controller (Oxford Instruments ITC503) and gas flow controller. CW EPR data were collected under slow-passage, non-saturating conditions. The spectrometer settings were as follows: conversion time = 40 ms, modulation amplitude = 0.5 mT, and modulation frequency = 100 kHz.

**Figure S1.** VT  $^1\text{H}$  NMR Spectrum of  $\text{Ar}^{i\text{Pr}_4}\text{SnSnAr}^{i\text{Pr}_4}$  (500 MHz,  $\text{C}_6\text{D}_6$ , 298K to 358K ppm)

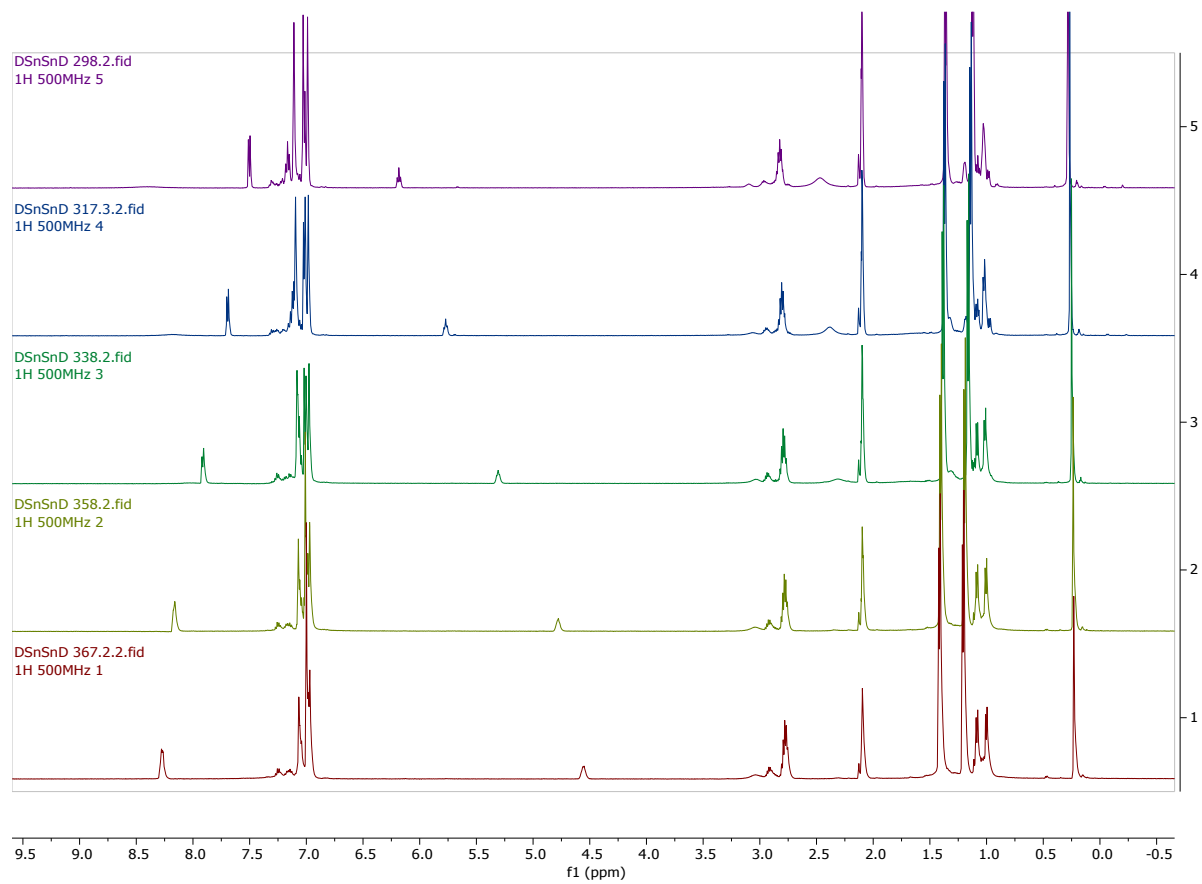

# Variable temperature $^1\text{H}$ NMR spectroscopy and Van't Hoff analysis of $\text{Ar}^{i\text{Pr}_4}\text{SnSnAr}^{i\text{Pr}_4}$

The integral for the signal atoms of the, meta aromatic hydrogen of the central ring were used for the determination of the equilibrium constant for dissociation.

$$f(T) = \ln \left[ \frac{(I_0 - I_2)^2}{I_2} \right] = - \frac{\Delta H_d^{298K}}{R} \left( \frac{1}{T} \right) + \ln \left( \frac{I_0 K_0}{4C_0} \right)$$

| I0    | T   | I2      | f(T)    | 1/T      | f(T)    |
|-------|-----|---------|---------|----------|---------|
| 2.335 | 298 | 2.275   | -6.4488 | 0.003356 | -6.4488 |
| 2.335 | 317 | 2.2197  | -5.1178 | 0.003155 | -5.117  |
| 2.335 | 328 | 2.08425 | -3.5010 | 0.003049 | -3.501  |
| 2.335 | 338 | 1.9272  | -2.4500 | 0.002959 | -2.450  |
| 2.335 | 358 | 1.8261  | -1.953  | 0.002793 | -1.953  |

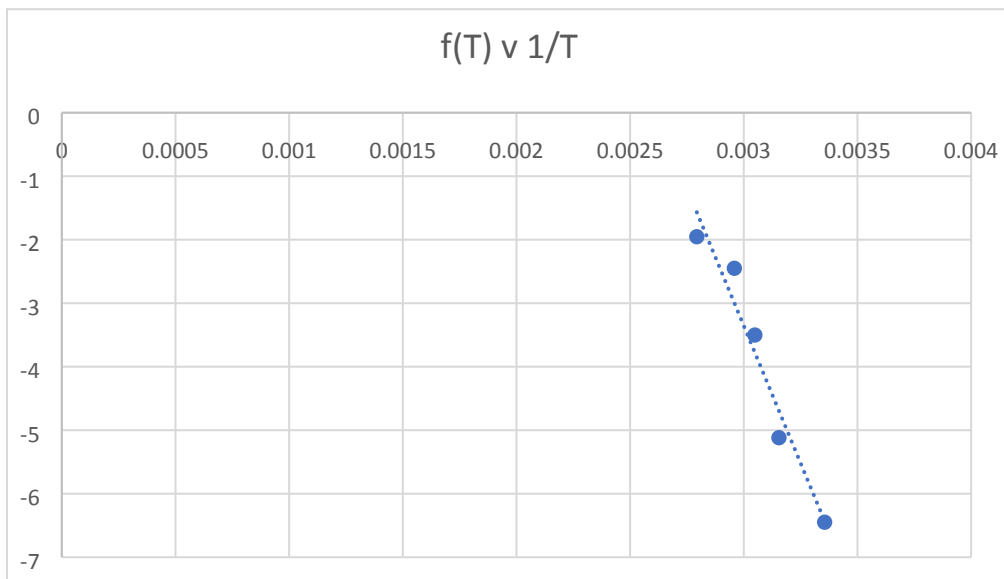

| <b>K</b>           | <b>lnK</b> | <b>1/T</b> |
|--------------------|------------|------------|
| <b>1.74845E-06</b> | -13.256    | 0.003356   |
| <b>6.61755E-06</b> | -11.925    | 0.003155   |
| <b>3.33323E-05</b> | -10.309    | 0.003049   |
| <b>9.53456E-05</b> | -9.258     | 0.002959   |
| <b>0.000156702</b> | -8.7611    | 0.002793   |

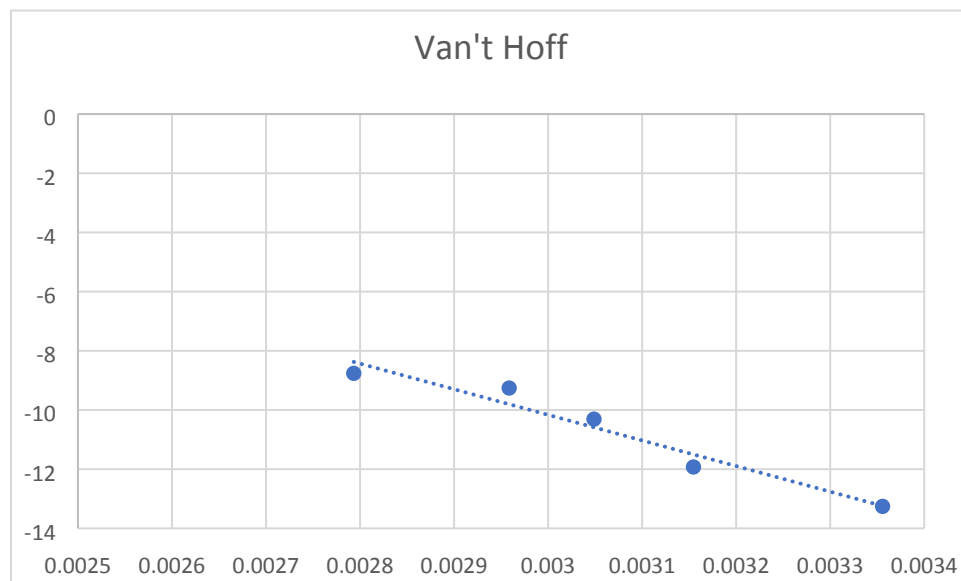

$$\Delta H_d^{298K} = 17.2 \pm 1.7 \text{ kcal mol}^{-1}$$

$$\Delta S_d = 31.4 \pm 3.14 \text{ cal mol}^{-1} \text{ K}^{-1}$$

$$\Delta G_d^{298K} = 7.84 \pm 0.78 \text{ kcal mol}^{-1}$$

Estimate of Error:

The uncertainty in the integration was estimated to be 10% due to broadening. The VT apparatus indicated an uncertainty in the temperature of 1°C. The concentration is accurate ca. 5%.

**Reference:**

1. Philips, A.D.; Wright, R.J.; Olmstead, M.M. and Power, P.P. Synthesis and Characterization of 2,6-Dipp<sub>2</sub>-H<sub>3</sub>C<sub>6</sub>SnSnC<sub>6</sub>H<sub>3</sub>-2,6-Dipp<sub>2</sub> (Dipp = C<sub>6</sub>H<sub>3</sub>-2,6-*i*Pr<sub>2</sub>): A Tin Analogue of an Alkyne *J. Am. Chem. Soc.*, **2002**, *124*, 5930-5931.
2. Rösel, S.; Becker, J.; Allen, W.D.; Schreiner, P.R. Probing the Delicate Balance between Pauli Repulsion and London Dispersion with Triphenylmethyl Derivatives *J. Am. Chem. Soc.* **2018**, *140*, 14421-14432
